1 **Title**

2 MAVE-NN: learning genotype-phenotype maps from multiplex assays of variant effect

3 **Authors**

4 Ammar Tareen<sup>1</sup>, Mahdi Kooshkbaghi<sup>1</sup>, Anna Posfai<sup>1</sup>, William T. Ireland<sup>2,3</sup>, David M.

5 McCandlish<sup>1</sup>, Justin B. Kinney<sup>1,\*</sup>

6 <sup>1</sup> Simons Center for Quantitative Biology, Cold Spring Harbor Laboratory, Cold Spring Harbor, NY, 11724

7 <sup>2</sup> Department of Physics, California Institute of Technology, Pasadena, CA, 91125

8 <sup>3</sup> Present address: Department of Applied Physics, Harvard University, Cambridge, MA, 02134

9 \* To whom correspondence should be addressed: [jkinney@cshl.edu](mailto:jkinney@cshl.edu)

10

11 **Abstract**

12 Multiplex assays of variant effect (MAVEs) are diverse techniques that include deep mutational  
13 scanning (DMS) experiments on proteins and massively parallel reporter assays (MPRAs) on  
14 cis-regulatory sequences. MAVEs are being rapidly adopted in many areas of biology, but a  
15 general strategy for inferring quantitative models of genotype-phenotype (G-P) maps from  
16 MAVE data is lacking. Here we introduce a conceptually unified approach for learning G-P maps  
17 from MAVE datasets. Our strategy is grounded in concepts from information theory, and is  
18 based on the view of G-P maps as a form of information compression. We also introduce  
19 MAVE-NN, an easy-to-use Python package that implements this approach using a neural  
20 network backend. The ability of MAVE-NN to infer diverse G-P maps—including biophysically  
21 interpretable models—is demonstrated on DMS and MPRA data in a variety of biological  
22 contexts. MAVE-NN thus provides a unified solution to a major outstanding need in the MAVE  
23 community.

24

## 25 **Main Text**

### 26 **Introduction**

27           Over the last decade, the ability to quantitatively study genotype-phenotype (G-P) maps  
28 has been revolutionized by the development of multiplex assays of variant effect (MAVEs),  
29 which can measure molecular phenotypes for thousands to millions of genotypic variants in  
30 parallel.<sup>1,2</sup> MAVE is an umbrella term that describes a diverse set of experimental methods,  
31 three examples of which are illustrated in **Fig. 1**. Deep mutational scanning (DMS) experiments<sup>3</sup>  
32 are a type of MAVE commonly used to study protein sequence-function relationships. These  
33 assays work by linking variant proteins to their coding sequences, either directly or indirectly,  
34 then using deep sequencing to assay which variants survive a process of activity-dependent  
35 selection (e.g., **Fig. 1a**). Massively parallel reporter assays (MPRAs) are another major class of  
36 MAVE, and are commonly used to study DNA or RNA sequences that regulate gene expression  
37 at a variety of steps, including transcription, mRNA splicing, cleavage and polyadenylation,  
38 translation, and mRNA decay.<sup>4-7</sup> MPRAs typically rely on either an RNA-seq readout of barcode  
39 abundances (**Fig. 1c**) or the sorting of cells expressing a fluorescent reporter gene (**Fig. 1e**).

40           Most computational methods for analyzing MAVE data have focused on accurately  
41 quantifying the activity of individual assayed sequences.<sup>8-14</sup> However, MAVE measurements like  
42 enrichment ratios or cellular fluorescence levels usually cannot be interpreted as providing  
43 direct quantification of biologically meaningful activities, due to the presence of experiment-  
44 specific nonlinearities and noise. Moreover, MAVE data is usually incomplete, as one often  
45 wishes to understand G-P maps over vastly larger regions of sequence space than can be  
46 exhaustively assayed. The explicit quantitative modeling of G-P maps can address both the  
47 indirectness and incompleteness of MAVE measurements.<sup>1,15</sup> The goal here is to determine a  
48 mathematical function that, given a sequence as input, will return a quantitative value for that

49 sequence's molecular phenotype. Such quantitative modeling has been of great interest since  
50 the earliest MAVE methods were developed,<sup>16–18</sup> but no general-use software has yet been  
51 described for inferring G-P maps of arbitrary functional form from MAVE data.

52 Here we introduce a unified conceptual framework for the quantitative modeling of  
53 MAVE data. This framework is based on the use of latent phenotype models, which assume that  
54 each assayed sequence has a well-defined latent phenotype (specified by the G-P map), of  
55 which the MAVE experiment provides an indirect readout (described by the measurement  
56 process). The quantitative forms of both the G-P map and the measurement process are then  
57 inferred from MAVE data simultaneously. We further introduce an information-theoretic  
58 approach for separately assessing the performance of the G-P map and the measurement  
59 process components of latent phenotype models. This strategy is implemented in an easy-to-  
60 use open-source Python package called MAVE-NN, which is built on a TensorFlow 2 backend.<sup>19</sup>  
61 In what follows, we expand on this unified MAVE modeling strategy and apply it to a diverse  
62 array of DMS and MPRA datasets. Along the way we note the substantial advantages that  
63 MAVE-NN provides over other MAVE modeling methods, illustrate how the capabilities of  
64 MAVE-NN can inform experimental design going forward, and highlight new biological insights  
65 that our quantitative modeling of MAVE data reveals.

## 66 **Results**

### 67 ***Latent phenotype modeling strategy***

68 MAVE-NN supports the analysis of MAVE data on DNA, RNA, and protein sequences,  
69 and can accommodate either continuous or discrete measurement values. Given a set of  
70 sequence-measurement pairs, MAVE-NN aims to infer a probabilistic mapping from sequence  
71 to measurement. Our primary enabling assumption, which is encoded in the structure of the  
72 latent phenotype model (**Fig. 2a**), is that this mapping occurs in two stages. Each sequence is

73 first mapped to a latent phenotype by a deterministic G-P map, then this latent phenotype is  
74 mapped to possible measurement values via a stochastic measurement process. During  
75 training, the G-P map and measurement process are simultaneously learned by maximizing a  
76 regularized form of likelihood. Our initial implementation of MAVE-NN assumes that latent  
77 phenotypes are one-dimensional quantities, but multidimensional latent phenotypes are fully  
78 compatible within this conceptual framework.<sup>20,21</sup>

79 MAVE-NN includes four types of built-in G-P maps: additive, neighbor, pairwise, and  
80 black box. Additive G-P maps assume that each character at each position within a sequence  
81 contributes independently to the latent phenotype. Neighbor G-P maps incorporate interactions  
82 between nearest-neighbor characters, while pairwise G-P maps include interactions between all  
83 pairs of characters regardless of their position. Black box G-P maps have the form of a densely  
84 connected multilayer perceptron, the specific architecture of which can be controlled by the  
85 user. MAVE-NN also supports custom G-P maps that can be used, e.g., to represent specific  
86 biophysical hypotheses about the mechanisms of sequence function.

87 To handle both discrete and continuous measurement values, two different strategies for  
88 modeling measurement processes are provided. Measurement process agnostic (MPA)  
89 regression uses techniques from the biophysics literature<sup>15,16,20,22</sup> to analyze MAVE datasets  
90 that report discrete measurements. Here the measurement process is represented by an  
91 overparameterized neural network that takes the latent phenotype value as input and outputs  
92 the probability of each possible measurement value (**Fig. 2b**). Global epistasis (GE) regression,  
93 by contrast, leverages ideas previously developed in the evolution literature<sup>23-26</sup> for analyzing  
94 datasets that contain continuous measurements (**Fig. 2c**). Here, the latent phenotype is  
95 nonlinearly mapped to a prediction that represents the most probable measurement value. A  
96 noise model is then used to describe the distribution of likely deviations from this prediction.  
97 MAVE-NN supports both homoscedastic and heteroscedastic noise models based on three

98 different classes of probability distribution: Gaussian, Cauchy, and skewed-t. We note that the  
99 skewed-t distribution, introduced by Jones and Faddy,<sup>27</sup> reduces to Gaussian and Cauchy  
100 distributions in certain limits while also accommodating asymmetric experimental noise. **Fig. 2d**  
101 shows an example of a GE measurement process with a heteroscedastic skewed-t noise model.

## 102 ***Information-theoretic measures of model performance***

103 We further propose three distinct quantities for assessing the performance of latent  
104 phenotype models (**Fig. 2e**). These quantities are motivated by thinking of G-P maps in terms of  
105 information compression. In information theory, a quantity called mutual information quantifies  
106 the amount of information that one variable encodes about another.<sup>28,29</sup> Unlike standard metrics  
107 of model performance, like accuracy or  $R^2$ , mutual information can be computed between any  
108 two types of variables (discrete, continuous, multi-dimensional, etc.). This property makes the  
109 information-based quantities we propose below applicable to all MAVE datasets, regardless of  
110 the specific type of experimental readout used. We note, however, that accurately estimating  
111 mutual information and related quantities from finite data is nontrivial and that MAVE-NN uses a  
112 variety of approaches to do this.

113 Intrinsic information,  $I_{\text{int}}$ , is the mutual information between the sequences and  
114 measurements contained within a MAVE dataset. This quantity provides a benchmark against  
115 which to compare the performance of inferred G-P maps. Predictive information,  $I_{\text{pre}}$ , is the  
116 mutual information between MAVE measurements and the latent phenotype values predicted by  
117 a G-P map of interest. This quantifies how well the G-P map preserves sequence-encoded  
118 information that is determinative of experimental measurements. When evaluated on test data,  
119  $I_{\text{pre}}$  is bounded above by  $I_{\text{int}}$ , and equality obtains only when the latent phenotype losslessly  
120 encodes relevant sequence-encoded information. Variational information,  $I_{\text{var}}$ , is a linear  
121 transformation of log likelihood that provides a variational lower bound on  $I_{\text{pre}}$ .<sup>30-32</sup> The

122 difference between  $I_{\text{pre}}$  and  $I_{\text{var}}$  quantifies how accurately the inferred measurement process  
123 matches the observed distribution of measurements and latent phenotypes (see **Supplemental**  
124 **Information**).

125 MAVE-NN infers model parameters by maximizing a (lightly) regularized form of  
126 likelihood. These computations are performed using the standard backpropagation-based  
127 training algorithms provided within the TensorFlow 2 backend. With certain caveats noted (see  
128 **Methods**), this optimization procedure maximizes  $I_{\text{pre}}$  while avoiding the costly estimates of  
129 mutual information at each iteration that have hindered the adoption of previous mutual-  
130 information-based modeling strategies.<sup>16</sup>

### 131 ***Application: deep mutational scanning assays***

132 We now demonstrate the capabilities of MAVE-NN on three DMS datasets, starting with  
133 the study of Olson et al.<sup>33</sup> on pairwise epistasis in protein G. Here the authors measured the  
134 effects of all single and nearly all double mutations to residues 2-56 of the IgG binding domain.  
135 This domain, called GB1, has long served as a model system for studying protein sequence-  
136 function relationships. To assay the binding of GB1 variants to IgG, the authors combined  
137 mRNA display with ultra-high-throughput DNA sequencing (**Fig. 1a**). The resulting dataset  
138 reports log enrichment values for all 1,045 single- and 530,737 double-mutant GB1 variants  
139 (**Fig. 1b**).

140 Inspired in by the work of Otwinowski et al.,<sup>26</sup> we used MAVE-NN to infer a latent  
141 phenotype model comprising an additive G-P map and a GE measurement process. This  
142 inference procedure required only about 3 minutes on a standard laptop computer  
143 (**Supplemental Fig. S1**). **Fig. 3a** illustrates the inferred additive G-P map via the effects that  
144 every possible single-residue mutation has on the latent phenotype. From this heatmap of  
145 additive effects, we can immediately identify all of the critical GB1 residues, including residues

146 27, 31, 41, 43, and 52. We also observe that missense mutations to proline throughout the GB1  
147 domain tend to negatively impact IgG binding, as expected due to this amino acid's exceptional  
148 conformational rigidity. **Fig. 3b** illustrates the corresponding GE measurement process,  
149 revealing a sigmoidal relationship between log enrichment measurements and the latent  
150 phenotype values predicted by the G-P map. Nonlinearities like this are ubiquitous in DMS data  
151 due to the presence of background and saturation effects. Unless they are explicitly accounted  
152 for in one's quantitative modeling efforts, as they are here, these nonlinearities can greatly  
153 distort the parameters of inferred G-P maps. **Fig. 3c** shows that accounting for this nonlinearity  
154 yields predictions that correlate quite well with measurement values. Moreover, every latent  
155 phenotype model inferred by MAVE-NN can be used as a MAVE dataset simulator (see  
156 Methods). By analyzing simulated data generated by our inferred model for this GB1  
157 experiment, we further observed that MAVE-NN can accurately and robustly recover the GE  
158 nonlinearity and ground-truth G-P map parameters (**Supplementary Fig. S1**).

159 **Fig. 3d** summarizes the values of our information-theoretic metrics for model  
160 performance. On held-out test data, we find that  $I_{\text{var}} = 2.194 \pm 0.020$  bits and  $I_{\text{pre}} = 2.220 \pm$   
161  $0.008$  bits and. The similarity of these two values suggests that the inferred GE measurement  
162 process, which includes a heteroscedastic skewed-t noise model, has nearly sufficient accuracy  
163 to fully describe the distribution of residuals. We further find that  $2.680 \pm 0.008$  bits  $\leq I_{\text{int}} \leq$   
164  $3.213 \pm 0.033$  bits (see **Methods**), meaning that the inferred G-P map accounts for 70%-84% of  
165 the total sequence-dependent information in the dataset. While this performance is impressive,  
166 the additive G-P map evidently misses some relevant sequence features. This observation  
167 motivates the more complex biophysical model for GB1 discussed later in **Results**.

168 The ability of MAVE-NN to deconvolve experimental nonlinearities from additive G-P  
169 maps requires that some of the assayed sequences contain multiple mutations. This is because  
170 such nonlinearities are inferred by reconciling the effects of single mutations with the effects



171 observed for combinations of two or more mutations. To investigate how many multiple-mutation  
172 variants are required, we performed GE inference on subsets of the GB1 dataset containing all  
173 1,045 single-mutation sequences and either 50,000, 5,000, or 500 double-mutation sequences  
174 (see **Methods**). The shapes of the resulting GE nonlinearities are illustrated in **Figs. 3e-g**.  
175 Remarkably, MAVE-NN is able to recover the underlying nonlinearity using only about 500  
176 randomly selected double mutants, which represent only ~0.1% of all possible double mutants.  
177 The analysis of simulated data also supports the ability to accurately recover ground-truth model  
178 predictions using highly reduced datasets (**Supplemental Fig. S1**). These findings have  
179 important implications for the design of DMS experiments: even if one only wants to determine  
180 an additive G-P map, including a modest number of multiple-mutation sequences in the assayed  
181 library is often advisable because it may allow the removal of artifactual nonlinearities.

182 To test the capabilities of MAVE-NN on less complete DMS datasets, we analyzed  
183 recent experiments on amyloid beta ( $A\beta$ )<sup>34</sup> and TDP-43,<sup>35</sup> both of which exhibit aggregation  
184 behavior in the context of neurodegenerative diseases. Like with GB1, the variant libraries used  
185 in both experiments included a substantial number of multiple-mutation sequences: 499 single-  
186 and 15,567 double-mutation sequences for  $A\beta$ ; 1,266 single- and 56,730 double-mutation  
187 sequences for TDP-43. But unlike with GB1, these datasets are highly incomplete due to the  
188 use of mutagenic PCR for variant library creation.

189 We used MAVE-NN to infer additive G-P maps from these two datasets, adopting the  
190 same type of latent phenotype model used for GB1. **Fig. 4a** illustrates the additive G-P map  
191 inferred from aggregation measurements of  $A\beta$  variants. In agreement with the original study,  
192 we see that most amino acid mutations between positions 30-40 have a negative effect on  
193 nucleation, suggesting that this region plays a major role in nucleation behavior. **Fig. 4b** shows  
194 the corresponding measurement process. Even though these data are much sparser than the  
195 GB1 data, the inferred model performs well on held-out test data ( $I_{\text{var}} = 1.147 \pm 0.043$  bits,

196  $I_{\text{pre}} = 1.254 \pm 0.024$  bits,  $R^2 = 0.793 \pm 0.071$ ). Similarly, **Figs. 4c-d** show the G-P map  
197 parameters and GE measurement process inferred from toxicity measurements of TDP-43  
198 variants, revealing among other things the toxicity-determining hot-spot observed by Bolognesi  
199 et al.<sup>35</sup> at positions 310-340. The resulting latent phenotype model performs well on held-out  
200 test data ( $I_{\text{var}} = 1.806 \pm 0.018$  bits,  $I_{\text{pre}} = 2.011 \pm 0.019$  bits,  $R^2 = 0.912 \pm 0.052$ ).

### 201 ***Application: a massively parallel splicing assay***

202 Exon/intron boundaries are defined by 5' splice sites (5'ss), which bind the U1 snRNP  
203 during the initial stages of spliceosome assembly. To investigate how 5'ss sequence  
204 quantitatively controls alternative mRNA splicing, Wong et al.<sup>36</sup> used a massively parallel  
205 splicing assay (MPSA) to measure percent-spliced-in (PSI) values for nearly all 32,768 possible  
206 5'ss of the form NNN/GYNNNN in three different genetic contexts (**Fig. 1c,d**). Applying MAVE-  
207 NN to data from the BRCA2 exon 17 context, we inferred four different types of G-P maps:  
208 additive, neighbor, pairwise, and black box. As with GB1, these G-P maps were each inferred  
209 using GE regression with a heteroscedastic skewed-t noise model. For comparison, we also  
210 inferred an additive G-P map using the epistasis package of Sailer and Harms.<sup>25</sup>

211 **Fig. 5a** compares the performance of these G-P map models on held-out test data, while  
212 **Figs. 5b-d** illustrate the corresponding inferred measurement processes. We observe that the  
213 additive G-P map inferred using the epistasis package<sup>25</sup> exhibits less predictive information  
214 ( $I_{\text{pre}} = 0.220 \pm 0.012$  bits) than the additive G-P map found using MAVE-NN ( $P = 0.007$ , two-  
215 sided z-test). This is likely because the epistasis package estimates the parameters of the  
216 additive G-P map prior to estimating the GE nonlinearity. We also note that, while the epistasis  
217 package provides a variety of options for modeling the GE nonlinearity, none of these options  
218 appear to work as well as our mixture-of-sigmoids approach (compare **Figs. 5b,c**). This finding

219 again demonstrates that the accurate inference of G-P maps requires the explicit and  
220 simultaneous modeling of experimental nonlinearities.

221 We also observe that increasingly complex G-P maps exhibit increased accuracy. For  
222 example, the additive G-P map gives  $I_{\text{pre}} = 0.262 \pm 0.011$  bits, whereas the pairwise G-P map  
223 (**Figs. 5e,f**) attains  $I_{\text{pre}} = 0.367 \pm 0.015$  bits. We note that the parameters of the pairwise G-P  
224 map appear to be very precisely determined, as MAVE-NN was able to accurately recover  
225 ground-truth parameters from simulated datasets of the same size (**Supplemental Fig. S2**).  
226 The black box G-P map, which is comprised of 5 densely connected hidden layers of 10 nodes  
227 each, performed the best of all four G-P maps, achieving  $I_{\text{pre}} = 0.489 \pm 0.012$  bits. Remarkably,  
228 this last predictive information value exceeds the lower bound of  $I_{\text{int}} \geq 0.461 \pm 0.007$  bits, which  
229 was estimated from replicate experiments (see **Methods**). We thus conclude that pairwise  
230 interaction models are not flexible enough to fully account for how 5' ss sequences control  
231 splicing. More generally, these results underscore the need for software that is capable of  
232 inferring and assessing a variety of different G-P maps through a uniform interface.

### 233 ***Application: biophysically interpretable G-P maps***

234 Biophysical models, unlike the phenomenological models considered thus far, have  
235 mathematical structures that reflect specific hypotheses about how sequence-dependent  
236 interactions between macromolecules mechanistically define G-P maps. Thermodynamic  
237 models, which rely on a quasi-equilibrium assumption, are the most commonly used type of  
238 biophysical model.<sup>37-39</sup> Previous studies have shown that precise thermodynamic models can  
239 be inferred from MAVE datasets,<sup>16</sup> but no software intended use by the broader MAVE  
240 community has yet been developed for doing this. MAVE-NN meets this need by enabling the  
241 inference of custom G-P maps. We now demonstrate this biophysical modeling capability in the

242 contexts of protein-ligand binding (using DMS data; **Fig. 1a**) and bacterial transcriptional  
243 regulation (using sort-seq MPRA data; **Fig. 1e**).

244 Otwinowski<sup>40</sup> showed that a three-state thermodynamic G-P map (**Fig. 6a**), one that  
245 accounts for GB1 folding energy in addition to GB1-IgG binding energy,<sup>41</sup> can explain the DMS  
246 data of Olson et al.<sup>33</sup> better than a simple additive G-P map does. This biophysical model  
247 subsequently received impressive confirmation in the work of Nisthal et al.,<sup>42</sup> who measured the  
248 thermostability of 812 single-mutation GB1 variants. We tested the ability of MAVE-NN to  
249 recover the same type of thermodynamic model that Otwinowski had inferred using custom  
250 analysis scripts. Our analysis yielded a G-P map with significantly improved performance on the  
251 data of Olson et al. ( $I_{\text{var}} = 2.353 \pm 0.012$  bits,  $I_{\text{pre}} = 2.373 \pm 0.009$  bits,  $R^2 = 0.948 \pm 0.002$ )  
252 relative to the additive G-P map of **Fig. 3**. **Fig. 6b** shows the two inferred energy matrices that  
253 respectively describe the effects of every possible single-residue mutation on the Gibbs free  
254 energies of protein folding and protein-ligand binding. The folding energy predictions our model  
255 also correlate as well with the data of Nisthal et al. ( $R^2 = 0.548 \pm 0.050$ ) as the predictions of  
256 Otwinowski's model does ( $R^2 = 0.517 \pm 0.058$ ). This demonstrates that MAVE-NN can infer  
257 accurate and interpretable quantitative models of protein biophysics.

258 To test MAVE-NN's ability to infer thermodynamic models of transcriptional regulation,  
259 we first re-analyzed the MPRA data of Kinney et al.,<sup>16</sup> in which random mutations to a 75 bp  
260 region of the *Escherichia coli lac* promoter were assayed. This promoter region binds two  
261 regulatory proteins,  $\sigma^{70}$  RNA polymerase (RNAP) and the transcription factor CRP. As in Kinney  
262 et al.,<sup>16</sup> we proposed a four-state thermodynamic model that quantitatively explains how  
263 promoter sequences control transcription rate (**Fig. 6c**). The parameters of this G-P map include  
264 the Gibbs free energy of interaction between CRP and RNAP, as well as energy matrices that  
265 describe the CRP-DNA and RNAP-DNA interaction energies. Because the sort-seq MPRA of

266 Kinney et al. yielded discrete measurement values (**Figs. 1e,f**), we used an MPA measurement  
267 process in our latent phenotype model (**Fig. 6d**). The biophysical parameter values we thus  
268 inferred (**Fig. 6e**) largely match those of Kinney et al., but were obtained far more rapidly (in ~10  
269 min versus multiple days) thanks to the use of stochastic gradient descent rather than  
270 Metropolis Monte Carlo.

271       Next we analyzed sort-seq MPRA data obtained by Belliveau et al.<sup>43</sup> for the *xyIE*  
272 promoter, which had no regulatory annotation prior to that study and for which no biophysical  
273 model had yet been developed. Based on their MPRA data, as well as follow-up mass  
274 spectrometry experiments, Belliveau et al. proposed that *xyIE* is regulated by RNAP, CRP, and  
275 the locus-specific regulator XylR. These findings motivated us to propose and train an eight-  
276 state thermodynamic model describing how interactions between these three regulatory proteins  
277 might control *xyIE* expression (**Fig. 6f**). The resulting quantitative model includes energy matrix  
278 descriptions for RNAP, CRP, and XylR binding to DNA, as well as Gibbs free energy values for  
279 the CRP-XylR and XylR-RNAP interactions (**Fig. 6g**). From this model we see that XylR  
280 activates RNAP through what appears to be a class II activation mechanism,<sup>44</sup> as energetic  
281 contributions from the -35 region of the RNAP binding site are markedly reduced in the *xyIE*  
282 context relative to the *lac* context (**Fig. 6e**). We also see that CRP—a homodimer with dyadic  
283 symmetry—binds its site with remarkable asymmetry (again, compare to **Fig. 6e**). The  
284 biophysical factors that determine whether symmetric transcription factors like CRP interact with  
285 DNA in symmetric or asymmetric poses are poorly understood, and represent just one avenue  
286 of investigation opened up by the capabilities of MAVE-NN. More generally, these results  
287 provide a proof-of-principle demonstration of how MAVE-NN can be used, together with MPRA  
288 experiments, to establish biophysical models for previously uncharacterized gene regulatory  
289 sequences.

## 290 **Discussion**

291           In this work we have presented a unified strategy for inferring quantitative models of G-P  
292 maps from diverse MAVE datasets. At the core of our approach is the conceptualization of G-P  
293 maps as a form of information compression, i.e., that the G-P map first compresses an input  
294 sequence into a latent phenotype value, which the MAVE then reads out indirectly via a noisy  
295 nonlinear measurement process. By explicitly modeling this measurement process, one can  
296 remove potentially confounding effects from the G-P map, as well as accommodate diverse  
297 experimental designs. We have also introduced three information-theoretic metrics for  
298 assessing the performance of the resulting models. These capabilities have been implemented  
299 within an easy-to-use Python package called MAVE-NN.

300           We have demonstrated the capabilities of MAVE-NN in diverse biological contexts,  
301 including in the analysis of both DMS and MPRA data. We have also demonstrated the superior  
302 performance of MAVE-NN relative to the epistasis package of Sailer and Harms.<sup>25</sup> Along the  
303 way, we observed that MAVE-NN can deconvolve experimental nonlinearities from additive G-P  
304 maps when a relatively small number of sequences containing multiple mutations are included  
305 in the assayed libraries. This capability provides a compelling reason for experimentalists to  
306 include such sequences in their MAVE libraries, even if they are primarily interested in the  
307 effects of single mutations. Finally, we showed how MAVE-NN can learn biophysically  
308 interpretable G-P maps from both DMS and MPRA data.

309           Applying MAVE-NN to the MPSA data of Wong et al.,<sup>36</sup> we discovered that pairwise  
310 interaction models are not sufficient to describe how 5' ss sequences govern alternative mRNA  
311 splicing, and that higher-order epistatic interactions are needed to describe this critical aspect of  
312 eukaryotic biology. We also inferred the first biophysical model for transcriptional regulation by  
313 the *xyIE* promoter. This biophysical model reveals that the well-studied transcription factor CRP  
314 binds its target site with surprising asymmetry *in vivo*, an intriguing phenomenon about which  
315 much remains to be learned.

316           MAVE-NN thus fills a critical need in the MAVE community, providing user-friendly  
317 software capable of learning quantitative models of G-P maps from diverse MAVE datasets.  
318 MAVE-NN has a streamlined user interface, is thoroughly tested, and is readily installed from  
319 PyPI by executing “pip install mavenn” at the command line. Comprehensive documentation,  
320 worked examples, and step-by-step tutorials are available at <http://mavenn.readthedocs.io>.

321 **Acknowledgements.** This work was supported by NIH grant 1R35GM133777 (awarded to  
322 JBK), NIH Grant 1R35GM133613 (awarded to DMM), an Alfred P. Sloan Research Fellowship  
323 (awarded to DMM), a grant from the CSHL/Northwell Health partnership, and funding from the  
324 Simons Center for Quantitative Biology at Cold Spring Harbor Laboratory.

325 **Author contributions.** AT, WTI, DMM, and JBK conceived the project. AT and JBK wrote the  
326 software with assistance from AP and MK. WTI and JBK wrote a preliminary version of the  
327 software. AT, MK, and JBK performed the data analysis. AT, DMM, and JBK wrote the  
328 manuscript with contributions from MK and AP.

329 **Conflicts of interest.** The authors declare that they have no known conflicts of interest.

330

331

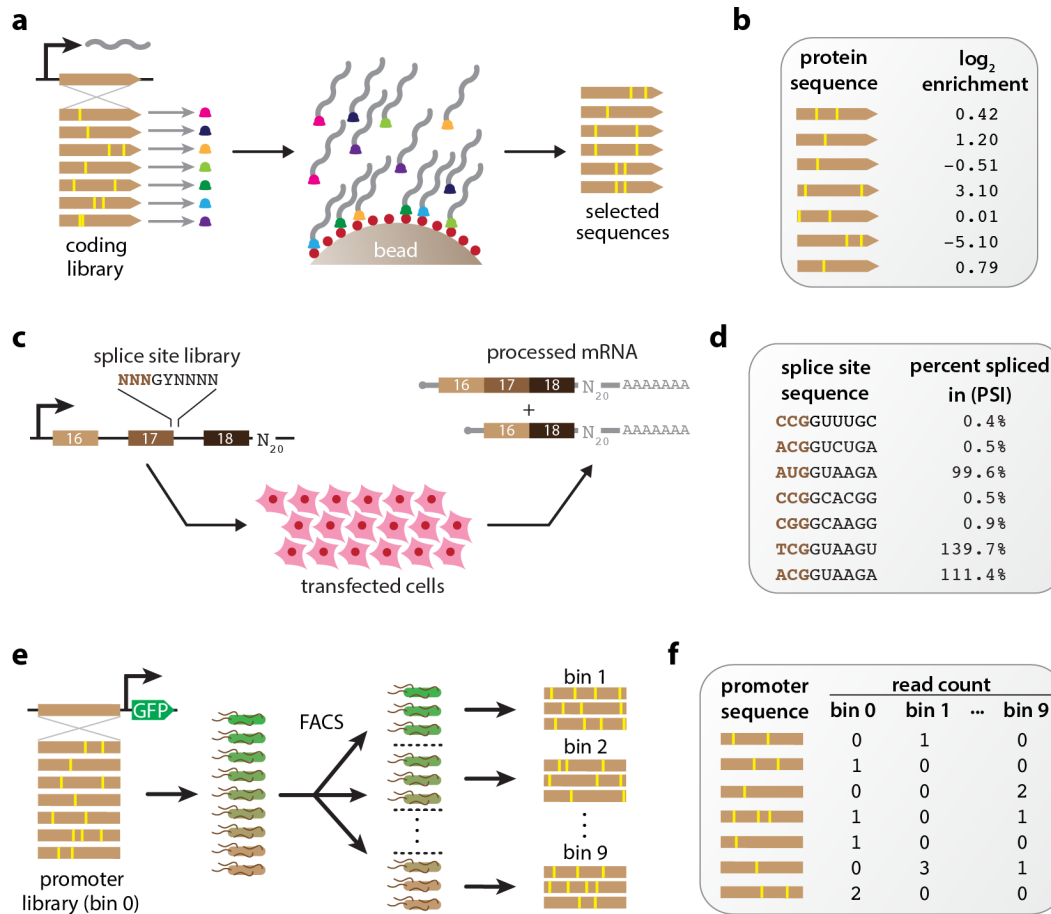

332

333 **Figure 1.** Three example MAVEs. (a) The DMS assay of Olson et al.<sup>33</sup> A library of variant GB1 proteins were  
 334 covalently linked to their coding mRNAs using mRNA display. Functional GB1 proteins were then enriched using IgG  
 335 beads, and deep sequencing was used to determine an enrichment ratio for each GB1 variant. (b) The resulting DMS  
 336 dataset consists of variant protein sequences and their corresponding log enrichment values. (c) The MPSA of Wong  
 337 et al.<sup>36</sup> A library of 3-exon minigenes was constructed from exons 16, 17, and 18 of *BRCA2*, with each minigene  
 338 having a variant 5' ss at exon 17 and a random 20 nt barcode in the 3' UTR. This library was transfected into HeLa  
 339 cells, and deep sequencing was used to quantify mRNA isoform abundance. (d) The resulting MPSA dataset  
 340 comprises variant 5' ss with (noisy) PSI values. (e) The sort-seq MPRA of Kinney et al.<sup>16</sup> A plasmid library was  
 341 generated in which randomly mutagenized versions of the *Escherichia coli lac* promoter drove the expression of GFP.  
 342 Cells carrying these plasmids were sorted using FACS, and the variant promoters in each bin of sorted cells as well  
 343 as the initial library were sequenced. (f) The resulting dataset comprises a list of variant promoter sequences, as well  
 344 as a matrix of counts for each variant in each FACS bin. MAVE: multiplex assay of variant effect; DMS: deep



345 mutational scanning; MPSA: massively parallel splicing assay; 5'ss: 5' splice site(s); PSI: percent spliced in; GFP:  
346 green fluorescent protein; FACS: fluorescence-activated cell sorting.

347

348

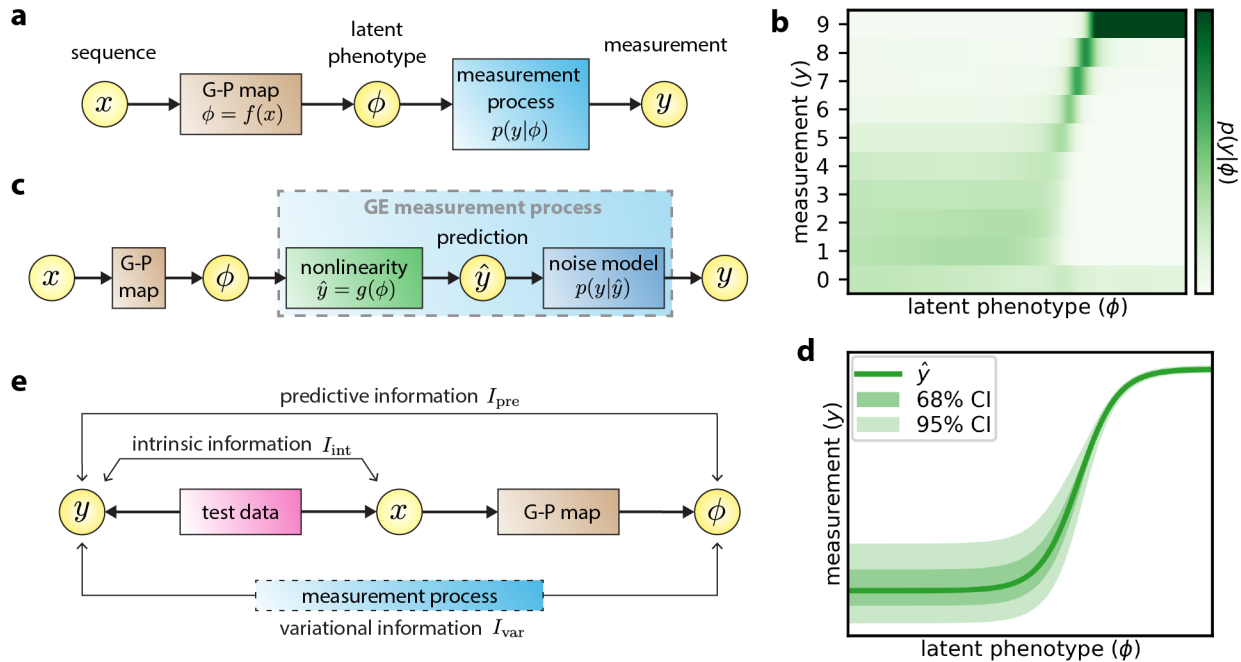

349

350 **Figure 2.** MAVE-NN quantitative modeling strategy. (a) Structure of latent phenotype models. A G-P map  $f(x)$  maps  
 351 each sequence  $x$  to a latent phenotype  $\phi$ , after which a measurement process  $p(y|\phi)$  determines the measurement  
 352  $y$ . (b) Example of an MPA measurement process inferred from the sort-seq MPRA data of Kinney et al.<sup>16</sup> MPA  
 353 measurement processes are used when  $y$  values are discrete. (c) Structure of a GE regression model, which is used  
 354 when  $y$  is continuous. A GE measurement process assumes that the mode of  $p(y|\phi)$ , called the prediction  $\hat{y}$ , is given  
 355 by a nonlinear function  $g(\phi)$ , and the scatter about this mode is described by a noise model  $p(y|\hat{y})$ . (d) Example of a  
 356 GE measurement process inferred from the DMS data of Olson et al.<sup>33</sup> Shown is the nonlinearity, the 68% CI, and  
 357 the 95% CI. (e) Information-theoretic quantities used to assess model performance. Intrinsic information,  $I_{int}$ , is the  
 358 mutual information between sequences  $x$  and measurements  $y$ . Predictive information,  $I_{pre}$ , is the mutual information  
 359 between measurements  $y$  and the latent phenotype values  $\phi$  assigned by a model. Variational information,  $I_{var}$ , is a  
 360 linear transformation of log likelihood. The inequality  $I_{int} \geq I_{pre} \geq I_{var}$  always holds on test data (modulo finite data  
 361 uncertainties), with  $I_{int} = I_{pre}$  when the G-P map is correct, and  $I_{pre} = I_{var}$  when the measurement process correctly  
 362 describes the distribution of  $y$  conditioned on  $\phi$ . G-P: genotype-phenotype; MPA: measurement process agnostic;  
 363 GE: global epistasis; CI: confidence interval.

364

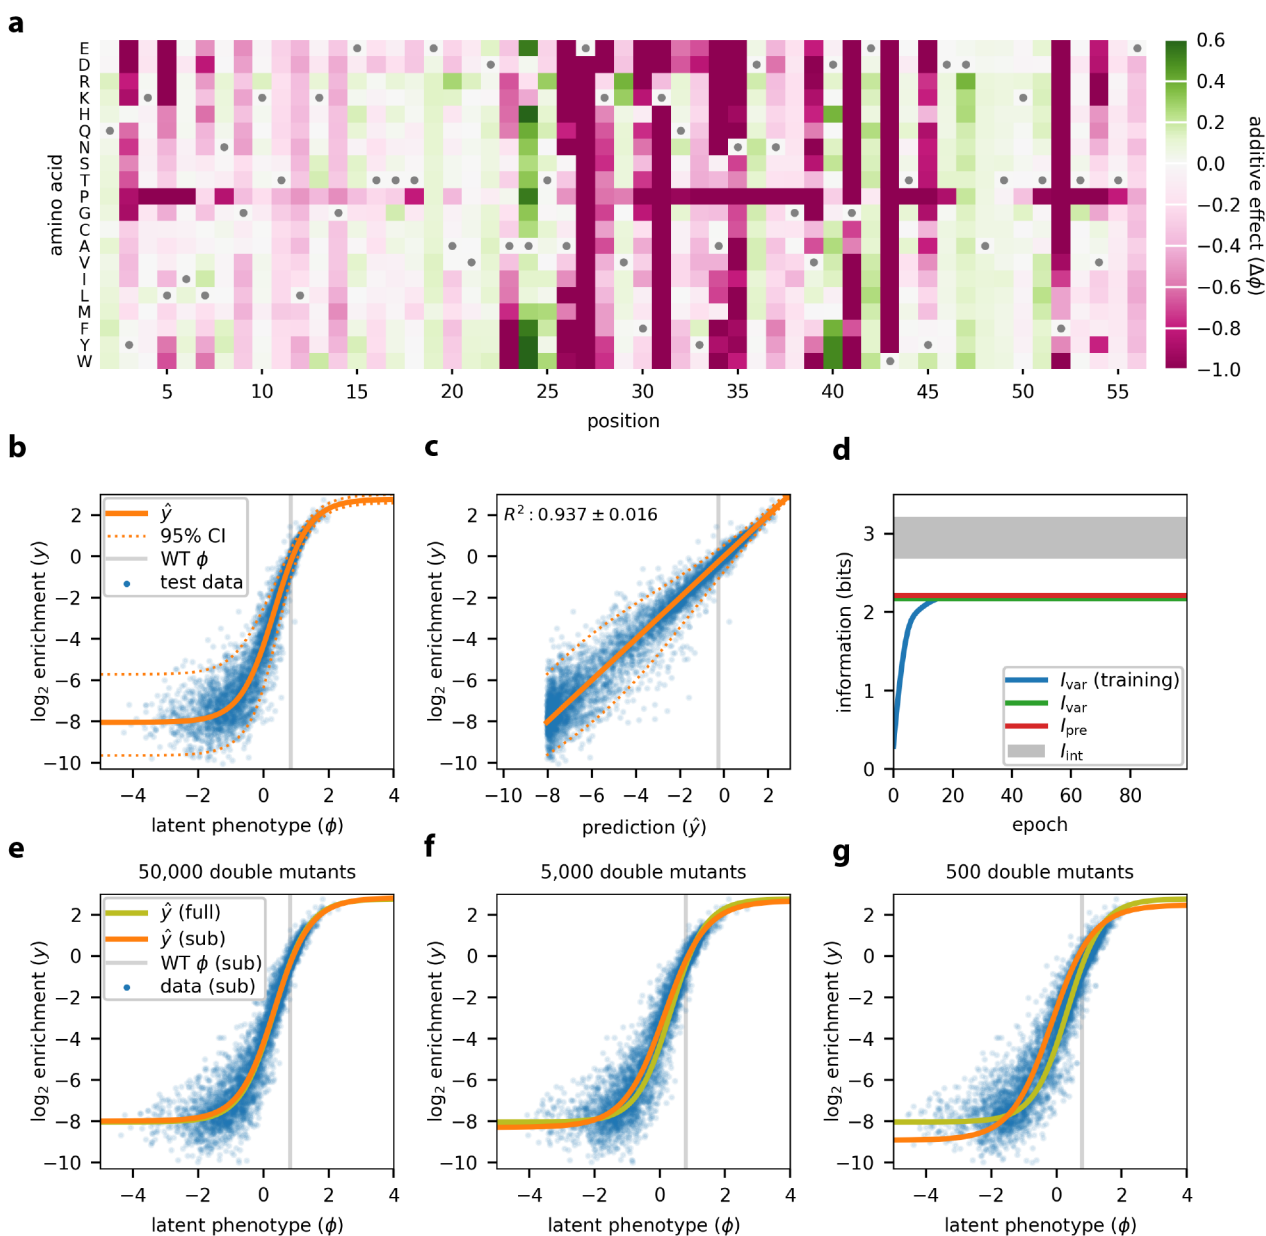

365

366 **Figure 3.** Analysis of DMS data for protein GB1. MAVE-NN was used to infer a latent phenotype model, consisting of  
 367 an additive G-P map and a GE measurement process having a heteroskedastic skewed-t noise model, from the DMS  
 368 data of Olson et al.<sup>33</sup> All 1,045 single variants and 530,737 pairwise variants reported for positions 2 to 56 of the GB1  
 369 domain were analyzed. Data were split 80:10:10 into training, validation, and test sets. (a) The G-P map parameters  
 370 inferred from all pairwise variants. Gray dots indicate wildtype residues. Amino acids are ordered as in Olson et al.<sup>33</sup>  
 371 (b) GE plot showing measurements versus predicted latent phenotype values for 5,000 randomly selected test-set

372 sequences (blue dots), alongside the inferred nonlinearity (solid orange line) and the 95% CI (dashed lines) of the  
373 noise model. Gray line indicates the latent phenotype value of the wildtype sequence. **(c)** Measurements plotted  
374 against  $\hat{y}$  predictions for these same sequences. Dashed lines indicate the 95% CI of the noise model. Gray line  
375 indicates the wildtype sequence  $\hat{y}$ . **(d)** Corresponding information metrics computed during model training (using  
376 training data) or for the final model (using test data); uncertainties in these estimates are roughly the width of the  
377 plotted lines. Gray shaded area indicates allowed values for intrinsic information based on upper and lower bounds  
378 estimated as described in **Methods**. **(e-g)** Test set predictions (blue dots) and GE nonlinearities (orange lines) for  
379 models trained using subsets of the GB1 data containing all single mutants and 50,000 **(e)**, 5,000 **(f)**, or 500 **(g)**  
380 double mutants. The GE nonlinearity from panel **b** is shown for reference (yellow-green lines). Uncertainties reflect  
381 standard errors. GE: global epistasis; G-P: genotype-phenotype; CI: confidence interval.

382

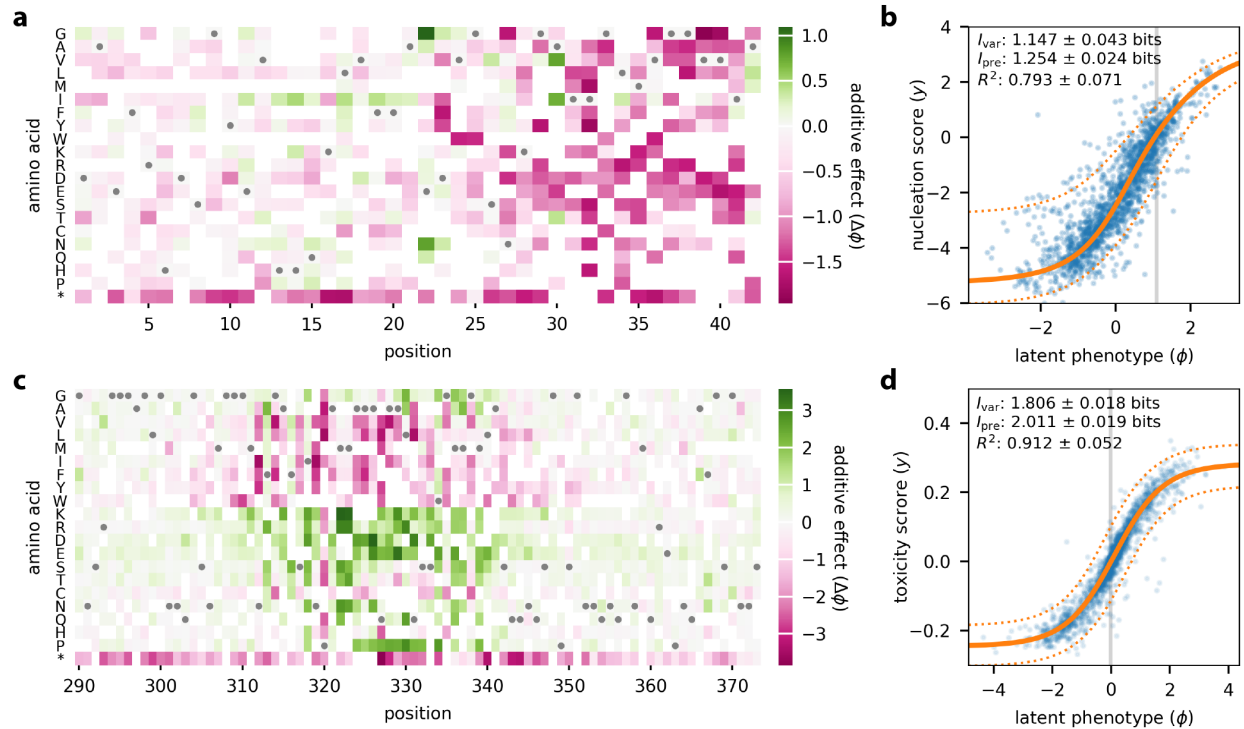

383

384 **Figure 4.** Analysis of DMS data for A $\beta$  and TDP-43. (a,b) Seuma et al.<sup>34</sup> measured nucleation scores for 499 single  
 385 mutants and 15,567 double mutants of A $\beta$ . These data were used to train a latent phenotype model comprising (a) an  
 386 additive G-P map and (b) a GE measurement process with a heteroskedastic skewed-t noise model. (c,d) Bolognesi  
 387 et al.<sup>35</sup> measured toxicity scores for 1,266 single mutants and 56,730 double mutants of TDP-43. The resulting data  
 388 were used to train (c) an additive G-P map and (d) a GE measurement process of the same form as in panel b. In  
 389 both cases, data were split 90:5:5 into training, validation, and test sets. In (a,c), gray dots indicate the wildtype  
 390 sequence, amino acids are ordered as in the original publications, and \* indicates a stop codon. In (b,d), blue dots  
 391 indicate latent phenotype values versus measurements for held-out test data, gray line indicates the latent phenotype  
 392 value of the wildtype sequence, solid orange line indicates the GE nonlinearity, and dashed orange lines indicate a  
 393 corresponding 95% CI for the inferred noise model. Values for  $I_{\text{var}}$ ,  $I_{\text{pre}}$ , and  $R^2$  (between  $y$  and  $\hat{y}$ ) are also shown.  
 394 Uncertainties reflect standard errors. **Supplemental Fig. S3** shows measurements plotted against the  $\hat{y}$  predictions  
 395 of these models. A $\beta$ : amyloid beta; TDP-43: TAR DNA-binding protein 43; G-P: genotype-phenotype; GE: global  
 396 epistasis; CI: confidence interval.

397

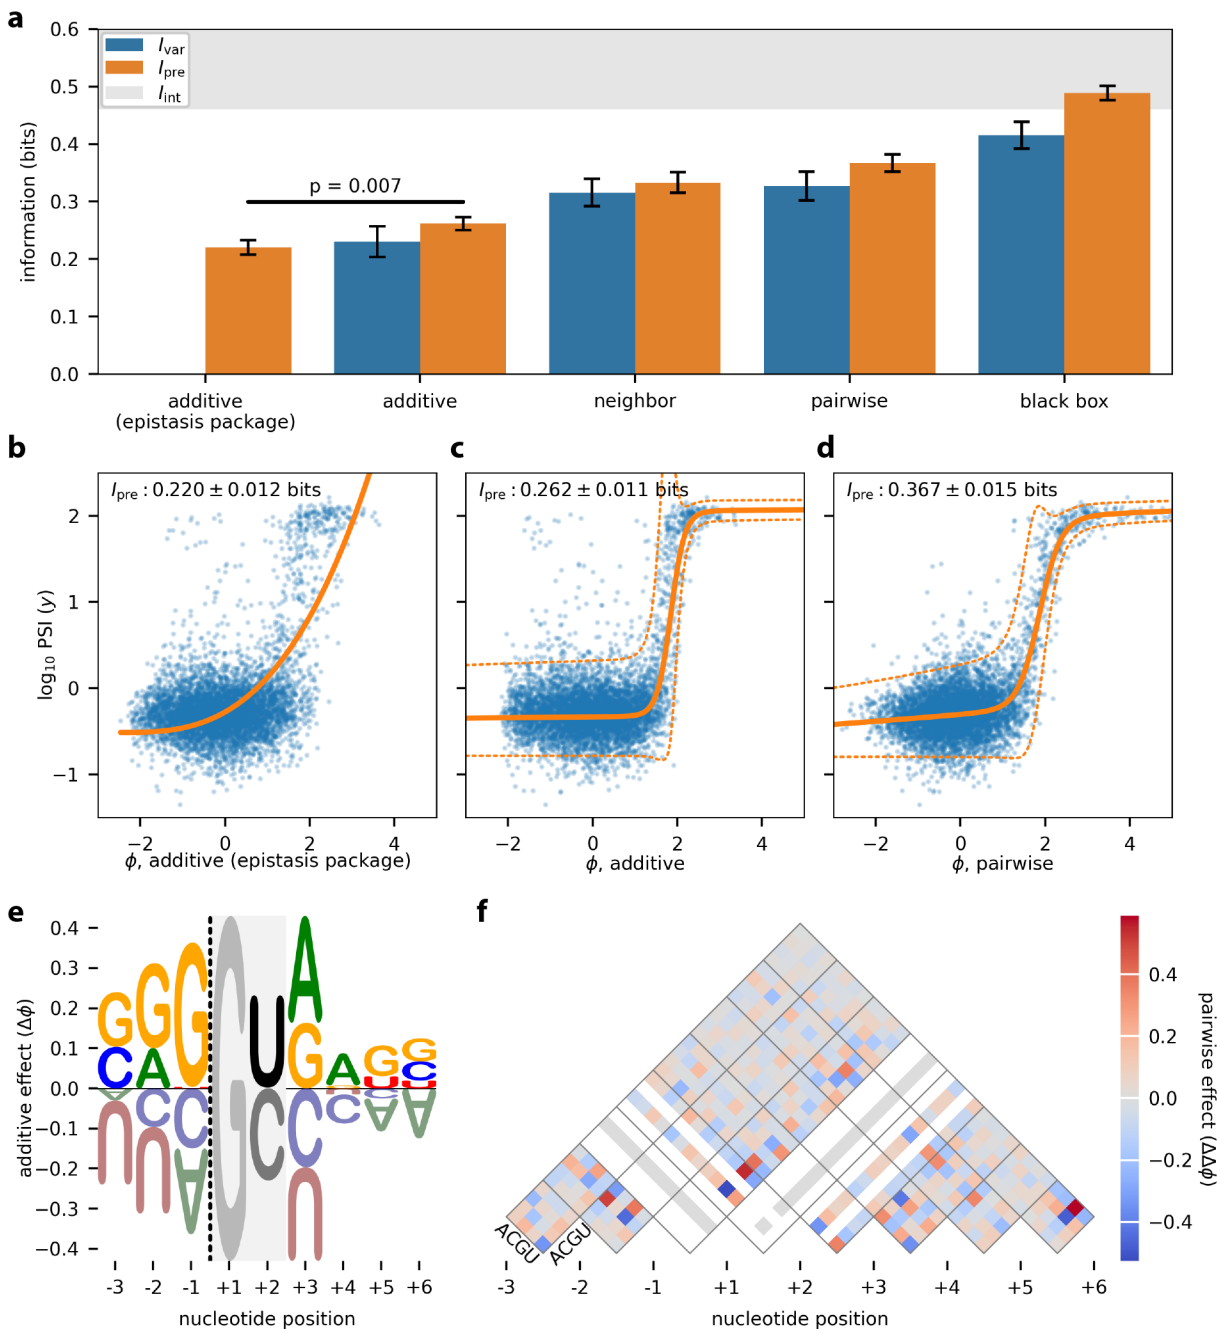

398

399 **Figure 5.** Analysis of MPSA data from Wong et al.<sup>36</sup> This dataset reports PSI values, measured in the *BRCA2* exon  
 400 17 context, for nearly all 32,768 variants 5' ss of the form NNN/GYNNNN. Data were split 60:20:20 into training,  
 401 validation, and test sets. Latent phenotype models with one of four types of G-P map (additive, neighbor, pairwise, or  
 402 black box), as well as a GE measurement process with a heteroscedastic skewed-t noise model, were inferred. The  
 403 epistasis package of Sailer and Harms<sup>25</sup> was also used to infer an additive G-P map and GE nonlinearity. (a)

404 Performance of trained models as quantified by  $I_{\text{var}}$  and  $I_{\text{pre}}$ , computed on test data. The lower bound on  $I_{\text{int}}$  was  
405 estimated from experimental replicates (see **Methods**). p-value reflects a two-sided z-test.  $I_{\text{var}}$  was not computed for  
406 the additive (epistasis package) model because that package does not infer an explicit noise model. **(b-d)**  
407 Measurement values versus latent phenotype values, computed on test data, using the additive (epistasis package)  
408 model **(b)**, the additive model **(c)**, and the pairwise model **(d)**. The corresponding GE measurement processes are  
409 also shown. **(e)** Sequence logo<sup>45</sup> illustrating the additive effects component of the pairwise G-P map. Dashed line  
410 indicates the exon/intron boundary. G at +1 serves as a placeholder because no other bases were assayed at this  
411 position. Only values for U and C at +2 were inferred. **(f)** Heatmap showing the pairwise effects component of the  
412 pairwise G-P map. White diagonals correspond to unobserved bases. Error bars indicate standard errors. MPSA:  
413 massively parallel splicing assay; PSI: percent spliced in; G-P: genotype-phenotype; GE: global epistasis.

414

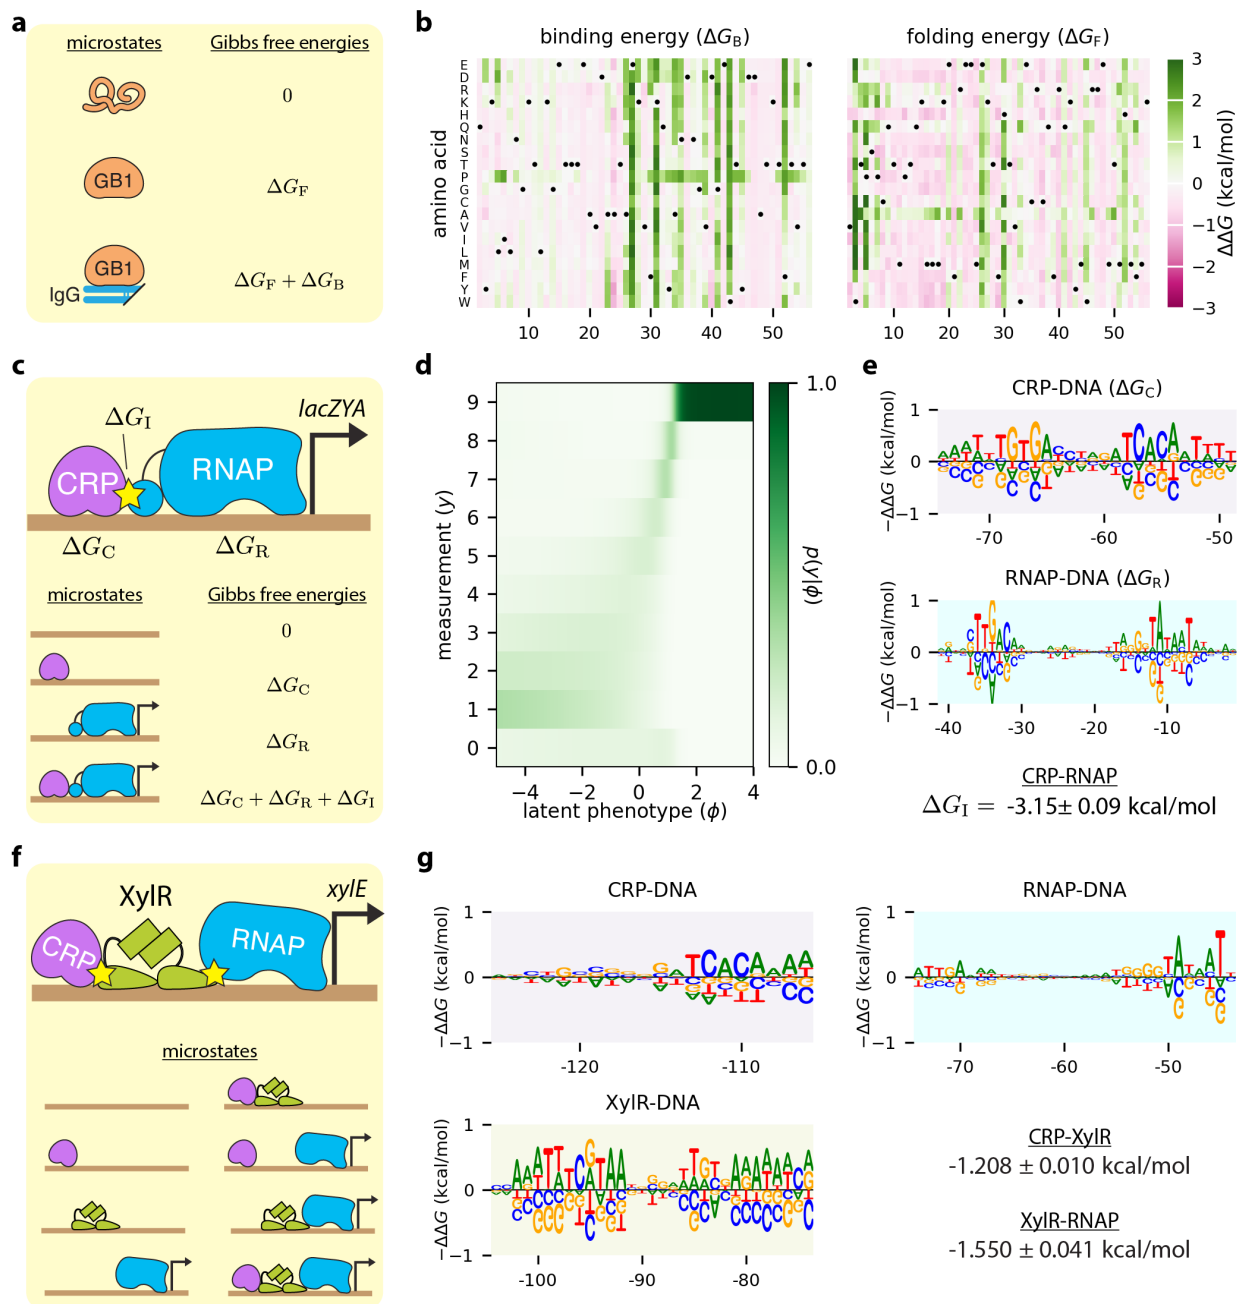

415

416 **Figure 6.** Biophysical models inferred from DMS and MPRA data. (a) Thermodynamic model for IgG binding by GB1.  
 417 This model comprises three GB1 microstates (unfolded, folded-unbound, and folded-bound). The Gibbs free energies  
 418 of folding ( $\Delta G_F$ ) and binding ( $\Delta G_B$ ) are computed from sequence using additive models called energy matrices. The  
 419 latent phenotype is given by the fraction of time GB1 is in the folded-bound state. (b) The  $\Delta\Delta G$  parameters of the  
 420 energy matrices for folding and binding, inferred from the data of Olson et al.<sup>33</sup> using GE regression. **Supplemental**  
 421 **Fig. S5** plots folding energy predictions against the measurements of Nisthal et al.<sup>42</sup> (c) A four-state thermodynamic



422 model for transcriptional activation at the *E. coli lac* promoter. The Gibbs free energies of RNAP-DNA binding ( $\Delta G_R$ )  
423 and CRP-DNA binding ( $\Delta G_C$ ) are computed using energy matrices, whereas the CRP-RNAP interaction energy  $\Delta G_I$  is  
424 a scalar. The latent phenotype is the fraction of time a promoter is bound by RNAP. **(d,e)** The latent phenotype model  
425 inferred from the sort-seq MPRA of Kinney et al.,<sup>16</sup> including both the MPA measurement process **(d)** and the  
426 parameters of the thermodynamic G-P map **(e)**. **(f)** An eight-state thermodynamic model for transcriptional activity at  
427 the *xyIE* promoter. **(g)** Corresponding G-P map parameters inferred from the sort-seq MPRA data of Belliveau et al..<sup>43</sup>  
428 These parameters include energy matrices describing the CRP-DNA, RNAP-DNA, and XylR-DNA interactions, as  
429 well as scalar values for the CRP-XylR and XylR-RNAP interaction free energies. Supplemental **Fig. S4** provides  
430 detailed definitions of the thermodynamic models in panels **a,c,f**. In panels **e,g**, sequence logos were generated  
431 using Logomaker,<sup>45</sup> and standard errors for protein-protein interactions energies were determined by analyzing  
432 simulated data. GE: global epistasis. RNAP: RNA polymerase. MPA: measurement-process agnostic. G-P: genotype-  
433 phenotype.

434

## 435 **Online Methods**

### 436 **Notation**

437 We represent each MAVE dataset as a set of  $N$  observations,  $\{(x_n, y_n)\}_{n=0}^{N-1}$ , where each  
438 observation consists of a sequence  $x_n$  and a measurement  $y_n$ . Here,  $y_n$  can be either a  
439 continuous real-valued number, or a nonnegative integer representing the “bin” in which the  $n$ th  
440 sequence was found. Note that, in this representation the same sequence  $x$  can be observed  
441 multiple times, potentially with different values for  $y$  due to experimental noise.

### 442 **G-P maps**

443 We assume that all sequences have the same length  $L$ , and that at each of the  $L$   
444 positions in each sequence there is one of  $C$  possible characters. MAVE-NN represents  
445 sequences using a vector of one-hot encoded features of the form

$$446 \quad x_{l:c} = \begin{cases} 1 & \text{if character } c \text{ occurs at position } l \\ 0 & \text{otherwise} \end{cases}, \quad (1)$$

447 where  $l = 0, 1, \dots, L - 1$  indexes positions within the sequence, and  $c$  indexes the  $C$  distinct  
448 characters. MAVE-NN supports built-in alphabets for DNA, RNA and protein (with or without  
449 stop codons), as well as user-defined sequence alphabets.

450 We assume that the latent phenotype is given by a linear function  $\phi(x; \theta)$  that depends  
451 on a set of G-P map parameters  $\theta$ . As mentioned in the main text, MAVE-NN supports four  
452 types of G-P map models, all of which can be inferred using either GE regression or MPA  
453 regression. The additive model is given by,

$$454 \quad \phi_{\text{additive}}(x; \theta) = \theta_0 + \sum_{l=0}^{L-1} \sum_c \theta_{l:c} x_{l:c}, \quad (2)$$

455 and thus each position in  $x$  contributes independently to the latent phenotype. The neighbor  
456 model is given by,

$$457 \quad \phi_{\text{neighbor}}(x; \theta) = \theta_0 + \sum_{l=0}^{L-1} \sum_c \theta_{l:c} x_{l:c} + \sum_{l=0}^{L-2} \sum_{c,c'} \theta_{l:c,l+1:c'} x_{l:c} x_{l+1:c'}, \quad (3)$$

458 and further accounts for potential epistatic interactions between neighboring positions. The  
459 pairwise model is given by,

$$460 \quad \phi_{\text{pairwise}}(x; \theta) = \theta_0 + \sum_{l=0}^{L-1} \sum_c \theta_{l:c} x_{l:c} + \sum_{l=0}^{L-2} \sum_{l'=l+1}^{L-1} \sum_{c,c'} \theta_{l:c,l':c'} x_{l:c} x_{l':c'}, \quad (4)$$

461 and includes interactions between all pairs of positions. Note our convention of requiring  $l' > l$  in  
462 the pairwise parameters  $\theta_{l:c,l':c'}$ .

463 Unlike these three parametric models, the black box G-P map does not have a fixed  
464 functional form. Rather, it is given by a multilayer perceptron that takes a vector of sequence  
465 features (additive, neighbor, or pairwise) as input, contains multiple fully-connected hidden  
466 layers with nonlinear activations, and has a single node output with a linear activation. Users are  
467 able to specify the number of hidden layers, the number of nodes in each hidden layer, and the  
468 activation function used by these nodes.

469 MAVE-NN further supports custom G-P maps that users can define by subclassing the G-  
470 P map base class. These G-P maps can have arbitrary functional form, e.g., representing specific  
471 biophysical hypotheses of sequence function. This feature of MAVE-NN is showcased in the  
472 analyses of **Fig. 6**.

473 **Gauge modes and diffeomorphic modes**

474 G-P maps typically have non-identifiable degrees of freedom that must be fixed, i.e.,  
475 pinned down, before the values of individual parameters can be meaningfully interpreted or  
476 compared between models. These degrees of freedom come in two flavors: gauge modes and  
477 diffeomorphic modes. Gauge modes are changes to  $\theta$  that do not alter the values of the latent  
478 phenotype  $\phi$ . Diffeomorphic modes<sup>15,20</sup> are changes to  $\theta$  that do alter  $\phi$ , but do so in ways that  
479 can be undone by transformations of the measurement process  $p(y|\phi)$ . As shown by Kinney  
480 and Atwal,<sup>15,20</sup> the diffeomorphic modes of linear G-P maps like those considered here will in  
481 general correspond to affine transformations of  $\phi$ , although additional unconstrained modes can  
482 occur in special situations.

483 MAVE-NN fixes both gauge modes and diffeomorphic modes of inferred models (except  
484 when using custom G-P maps). The diffeomorphic modes of G-P maps are fixed by  
485 transforming  $\theta$  via

$$486 \quad \theta_0 \rightarrow \theta_0 - a, \quad (5)$$

487 and then

$$488 \quad \theta \rightarrow \frac{\theta}{b}, \quad (6)$$

489 where  $a = \text{mean}(\{\phi_n\})$  and  $b = \text{std}(\{\phi_n\})$  are the mean and standard deviation of  $\phi$  values  
490 computed on the training data. This produces a corresponding change in latent phenotype  
491 values  $\phi \rightarrow (\phi - a)/b$ . To avoid altering likelihood values, MAVE-NN makes a corresponding  
492 transformation to the measurement process  $p(y|\phi)$ . In GE regression this is done by adjusting  
493 the GE nonlinearity via

$$494 \quad g(\phi) \rightarrow g(a + b\phi), \quad (7)$$

495 while keeping the noise model  $p(y|\hat{y})$  fixed. In MPA regression MAVE-NN transforms the full  
496 measurement process via

497 
$$p(y|\phi) \rightarrow p(y|a + b\phi) . \tag{8}$$

498 For the three parametric G-P maps, gauge modes are fixed using what we call the  
 499 “hierarchical gauge.” Here, the parameters  $\theta$  are adjusted so that the lower-order terms in  
 500  $\phi(x; \theta)$  account for the highest possible fraction of variance in  $\phi$ . This procedure requires a  
 501 probability distribution on sequence space with respect to which these variances are computed.  
 502 MAVE-NN assumes that such distributions factorize by position, and can thus be represented  
 503 by a probability matrix with elements  $p_{l:c}$ , denoting the probability of character  $c$  at position  $l$ .  
 504 MAVE-NN provides three built-in choices for this distribution: uniform, empirical, or wildtype.  
 505 The corresponding values of  $p_{l:c}$  are given by

506 
$$p_{l:c} = \begin{cases} 1/C & \text{for uniform} \\ n_{l:c}/N & \text{for empirical ,} \\ x_{l:c}^{\text{wt}} & \text{for wildtype} \end{cases} \tag{9}$$

507 where  $n_{l:c}$  denotes the number of sequences (out of  $N$  total) that have character  $c$  at position  $l$ ,  
 508 and  $x_{l:c}^{\text{wt}}$  is the one-hot encoding of a user-specified wildtype sequence. In particular, the  
 509 wildtype gauge was used for illustrating the additive G-P maps in **Fig. 3** and **Fig. 4**, while the  
 510 uniform gauge was used for illustrating the pairwise G-P map in **Fig. 5** and the energy matrices  
 511 in **Fig. 6**. After a sequence distribution is chosen, MAVE-NN fixes the gauge of the pairwise G-P  
 512 map by transforming

513 
$$\theta_0 \rightarrow \theta_0 + \sum_l \sum_{c'} \theta_{l:c'} p_{l:c'} + \sum_l \sum_{l' > l} \sum_{c,c'} \theta_{l:c,l':c'} p_{l:c} p_{l':c'} , \tag{10}$$

$$\begin{aligned}
 \theta_{l:c} &\rightarrow \theta_{l:c} \\
 &- \sum_{c'} \theta_{l:c'} p_{l:c'} \\
 &+ \sum_{l'>l} \sum_{c'} \theta_{l:c,l':c'} p_{l':c'} \\
 514 &+ \sum_{l'<l} \sum_{c'} \theta_{l':c',l:c} p_{l':c'} \tag{11} \\
 &- \sum_{l'>l} \sum_{c',c''} \theta_{l:c',l':c''} p_{l:c'} p_{l':c''} \\
 &- \sum_{l'<l} \sum_{c',c''} \theta_{l':c'',l':c'} p_{l:c'} p_{l':c''} ,
 \end{aligned}$$

515 and

$$\begin{aligned}
 \theta_{l:c,l':c'} &\rightarrow \theta_{l:c,l':c'} \\
 &- \sum_{c''} \theta_{l:c'',l':c'} p_{l:c''} \\
 516 &- \sum_{c''} \theta_{l:c,l':c''} p_{l':c''} \tag{12} \\
 &+ \sum_{c'',c'''} \theta_{l:c'',l':c'''} p_{l:c''} p_{l':c'''} .
 \end{aligned}$$

517 This transformation is also used for the additive and neighbor G-P maps, but with  $\theta_{l:c,l':c'} = 0$  for  
 518 all  $l, l'$  (additive) or whenever  $l' \neq l + 1$  (neighbor).

### 519 GE nonlinearities

520 GE models assume that each measurement  $y$  is a nonlinear function of the latent  
 521 phenotype  $g(\phi)$  plus some noise. In MAVE-NN, this nonlinearity is represented as a sum of  
 522 tanh sigmoids:

$$523 \quad g(\phi; \alpha) = a + \sum_{k=0}^{K-1} b_k \tanh(c_k \phi + d_k) . \tag{13}$$

524 Here,  $K$  specifies the number of hidden nodes contributing to the sum, and  $\alpha = \{a, b_k, c_k, d_k\}$  are  
525 trainable parameters. We note that this mathematical form is an example of the bottleneck  
526 architecture previously used by<sup>21,24</sup> for modeling GE nonlinearities. By default, MAVE-NN  
527 constrains  $g(\phi; \alpha)$  to be monotonic in  $\phi$  by requiring all  $b_k \geq 0$  and  $c_k \geq 0$ , but this constraint  
528 can be relaxed.

## 529 GE noise models

530 MAVE-NN supports three types of GE noise model: Gaussian, Cauchy, and skew-t.  
531 These all support the analytic computation of quantiles and confidence intervals, as well as the  
532 rapid sampling of simulated measurement values. The Gaussian noise model is given by

$$533 \quad p_{\text{gauss}}(y|\hat{y}; s) = \frac{1}{\sqrt{2\pi s^2}} \exp\left[-\frac{(y - \hat{y})^2}{2s^2}\right], \quad (14)$$

534 where  $s$  denotes the standard deviation. Importantly, MAVE-NN allows this noise model to be  
535 heteroskedastic by representing  $s$  as an exponentiated polynomial in  $\hat{y}$ , i.e.,

$$536 \quad s(\hat{y}) = \exp\left[\sum_{k=0}^K a_k \hat{y}^k\right], \quad (15)$$

537 where  $K$  is the order of the polynomial and  $\{a_k\}$  are trainable parameters. The user has the  
538 option to set  $K$ , and setting  $K = 0$  renders this noise model homoscedastic. Quantiles are  
539 computed using  $y_q = \hat{y} + s\sqrt{2} \operatorname{erf}^{-1}(2q - 1)$  for user-specified values of  $q \in [0,1]$ . Similarly, the  
540 Cauchy noise model is given by

$$541 \quad p_{\text{cauchy}}(y|\hat{y}; s) = \left[\pi s \left(1 + \frac{(y - \hat{y})^2}{s^2}\right)\right]^{-1}, \quad (16)$$

542 where the scale parameter  $s$  is an exponentiated  $K$ 'th order polynomial in  $\hat{y}$ , and quantiles are  
543 computed using  $y_q = \hat{y} + s \tan\left[\pi\left(q - \frac{1}{2}\right)\right]$ .

544 The skew-t noise model is of the form described by Jones and Faddy,<sup>27</sup> and is given by

545 
$$p_{\text{skewt}}(y|\hat{y}; s, a, b) = s^{-1}f(t; a, b), \quad (17)$$

546 where

547 
$$t = t^* + \frac{y - \hat{y}}{s}, \quad t^* = \frac{(a - b)\sqrt{a + b}}{\sqrt{2a + 1}\sqrt{2b + 1}}, \quad (18)$$

548 and

549 
$$f(t; a, b) = \frac{2^{1-a-b} \Gamma(a + b)}{\sqrt{a + b} \Gamma(a) \Gamma(b)} \left[ 1 + \frac{t}{\sqrt{a + b + t^2}} \right]^{a+\frac{1}{2}} \times \left[ 1 - \frac{t}{\sqrt{a + b + t^2}} \right]^{b+\frac{1}{2}}. \quad (19)$$

550 Note that the  $t$  statistic here is an affine function of  $y$  chosen so that the distribution's mode  
 551 (corresponding to  $t^*$ ) is positioned at  $\hat{y}$ . The three parameters of this noise model,  $\{s, a, b\}$ , are  
 552 each represented using  $K$ -th order exponentiated polynomials with trainable coefficients.  
 553 Quantiles are computed using

554 
$$y_q = \hat{y} + (t_q - t^*)s, \quad (20)$$

555 where

556 
$$t_q = \frac{(2x_q - 1)\sqrt{a + b}}{\sqrt{1 - (2x_q - 1)^2}}, \quad x_q = I_q^{-1}(a, b), \quad (21)$$

557 and  $I^{-1}$  denotes the inverse of the regularized incomplete Beta function  $I_x(a, b)$ .

558 **MPA measurement process**

559 In MPA regression, MAVE-NN directly models the measurement process  $p(y|\phi)$ . At  
 560 present, MAVE-NN only supports MPA regression for discrete values of  $y$  indexed using



561 nonnegative integers. MAVE-NN supports two alternative forms of input for MPA regression.  
 562 One is a set of sequence-measurement pairs  $\{(x_n, y_n)\}_{n=0}^{N-1}$ , where  $N$  is the total number of  
 563 reads,  $\{x_n\}$  is a set of (typically) non-unique sequences, each  $y_n \in \{0, 1, \dots, Y-1\}$  is a bin  
 564 number, and  $Y$  is the total number of bins. The other is a set of sequence-count-vector pairs  
 565  $\{(x_m, c_m)\}_{m=0}^{M-1}$ , where  $M$  is the total number of unique sequences and  $c_m = (c_{m0}, c_{m1}, \dots, c_{m(Y-1)})$   
 566 is a vector that lists the number of times  $c_{my}$  that the sequence  $x_m$  was observed in each bin  $y$ .  
 567 MPA measurement processes are represented as multilayer perceptron with one hidden layer  
 568 (having tanh activations) and a softmax output layer. Specifically,

$$569 \quad p(y|\phi) = \frac{w_y(\phi)}{\sum_{y'} w_{y'}(\phi)}, \quad (22)$$

570 where

$$571 \quad w_y(\phi) = \exp[a_y + \sum_{k=0}^{K-1} b_{yk} \tanh(c_{yk}\phi + d_{yk})] \quad (23)$$

572 and  $K$  is the number of hidden nodes per value of  $y$ . The trainable parameters of this  
 573 measurement process are  $\eta = \{a_y, b_{yk}, c_{yk}, d_{yk}\}$ .

## 574 **Loss function**

575 Let  $\theta$  denote the G-P map parameters, and  $\eta$  denote the parameters of the  
 576 measurement process. MAVE-NN optimizes these parameters using stochastic gradient  
 577 descent on a loss function given by

$$578 \quad \mathcal{L} = \mathcal{L}_{\text{like}} + \mathcal{L}_{\text{reg}}, \quad (24)$$

579 where  $\mathcal{L}_{\text{like}}$  is the negative log likelihood of the model, given by

$$580 \quad \mathcal{L}_{\text{like}}[\theta, \eta] = - \sum_{n=0}^{N-1} \log [p(y_n | \phi_n; \eta)] \quad (25)$$

581 where  $\phi_n = \phi(x_n; \theta)$ , and  $\mathcal{L}_{\text{reg}}$  provides for regularization of the model parameters.

582 In the context of GE regression, we can write  $\eta = (\alpha, \beta)$  where  $\alpha$  represents the  
583 parameters of the GE nonlinearity  $g(\phi; \alpha)$ , and  $\beta$  denotes the parameters of the noise model  
584  $p(y|\hat{y}; \beta)$ . The likelihood contribution from each observation  $n$  then becomes  $p(y_n|\phi_n; \eta) =$   
585  $p(y_n|\hat{y}_n; \beta)$  where  $\hat{y}_n = g(\phi_n; \alpha)$ . In the context of MPA regression with a dataset of the form  
586  $\{(x_m, c_m)\}_{m=0}^{M-1}$ , the loss function simplifies to

$$587 \quad \mathcal{L}_{\text{like}}[\theta, \eta] = - \sum_{m=0}^{M-1} \sum_{y=0}^{Y-1} c_{my} \log[p(y|\phi_m; \eta)] \quad (26)$$

588 where  $\phi_m = \phi(x_m; \theta)$ . For the regularization term, MAVE-NN uses an  $L_2$  penalty of the form

$$589 \quad \mathcal{L}_{\text{reg}}[\theta, \eta] = \lambda_{\theta} |\theta|^2 + \lambda_{\eta} |\eta|^2, \quad (27)$$

590 where the user-adjusted parameters  $\lambda_{\theta}$  and  $\lambda_{\eta}$  respectively control the strength of regularization  
591 for the G-P map and measurement process parameters.

## 592 Predictive information

593 In what follows, we use  $p_{\text{model}}(y|\phi)$  to denote a measurement process inferred by  
594 MAVE-NN, whereas  $p_{\text{true}}(y|\phi)$  denotes the empirical conditional distribution of  $y$  and  $\phi$  values  
595 that would be observed in the limit of infinite test data.

596 Predictive information  $I_{\text{pre}} = I[y; \phi]$ , where  $I[\cdot; \cdot]$  represents mutual information computed  
597 on data not used for training (i.e., a held-out test set or data from a different experiment),  $I_{\text{pre}}$   
598 provides a measure of how strongly a G-P map predicts experimental measurements.  
599 Importantly, this quantity does not depend on the corresponding measurement process  
600  $p_{\text{model}}(y|\phi)$ . To estimate  $I_{\text{pre}}$ , we use  $k$ 'th nearest neighbor (kNN) estimators of entropy and  
601 mutual information adapted from the NPEET Python package.<sup>46</sup> Here, the user has the option of

602 adjusting  $k$ , which controls a variance/bias tradeoff. When  $y$  is discrete (MPA regression),  $I_{\text{pre}}$  is  
 603 computed using the classic kNN entropy estimator<sup>47,48</sup> via the decomposition  $I[y; \phi] = H[\phi] -$   
 604  $\sum_y p(y) H_y[\phi]$ , where  $H_y[\phi]$  denotes the entropy of  $p_{\text{true}}(\phi|y)$ . When  $y$  is continuous (GE  
 605 regression),  $I[y; \phi]$  is estimated using the kNN-based Kraskov Stögbauer Grassberger (KSG)  
 606 algorithm.<sup>48</sup> This approach optionally supports the local nonuniformity correction of Gao et al.,<sup>49</sup>  
 607 which is important when  $y$  and  $\phi$  exhibit strong dependencies, but which also requires  
 608 substantially more time to compute.

### 609 Variational information

610 We define variational information as an affine transformation of  $\mathcal{L}_{\text{like}}$ ,

$$611 \quad I_{\text{var}} = H[y] - \frac{\log_2(e)}{N} \mathcal{L}_{\text{like}}. \quad (28)$$

612 Here,  $H[y]$  is the entropy of the data  $\{y_n\}$ , which is estimated using the  $k$ 'th nearest neighbor  
 613 (kNN) estimator from the NPEET package.<sup>46</sup> Noting that this quantity can also be written as  
 614  $I_{\text{var}} = H[y] - \text{mean}(\{Q_n\})$ , where  $Q_n = -\log_2 p(y_n|\phi_n)$ , we estimate the associated uncertainty  
 615 using

$$616 \quad \delta I_{\text{var}}[y; \phi] = \sqrt{\delta H[y]^2 + \frac{\text{var}(\{Q_n\})}{N}}. \quad (29)$$

617 The inference strategy used by MAVE-NN is based on the fact that  $I_{\text{var}}$  provides a tight  
 618 variational lower bound on  $I_{\text{pre}}$ .<sup>30</sup> Indeed, in the large data limit,

$$619 \quad I_{\text{pre}} = I_{\text{var}} + D_{\text{KL}}(p_{\text{true}}||p_{\text{model}}), \quad (30)$$

620 where  $D_{\text{KL}}(\cdot) \geq 0$  is the Kullback-Leibler divergence, and thus quantifies the accuracy of the  
 621 inferred measurement process. From **Eq. 30** one can see that, with appropriate caveats,  
 622 maximizing  $I_{\text{var}}$  (or equivalently,  $\mathcal{L}_{\text{like}}$ ) will also maximize  $I_{\text{pre}}$ .<sup>20</sup> But unlike  $I_{\text{pre}}$ ,  $I_{\text{var}}$  is readily

623 compatible with backpropagation and stochastic gradient descent. See Supplemental  
624 Information for a derivation of **Eq. 30** and an expanded discussion of this key point. Note:  
625 Sharpee et al.<sup>50</sup> cleverly showed that  $I_{\text{pre}}$  can, in fact, be optimized using stochastic gradient  
626 descent. Computing gradients of  $I_{\text{pre}}$ , however, requires a time-consuming density estimation  
627 step. Optimizing  $I_{\text{var}}$ , on the other hand, can be done using standard per-datum  
628 backpropagation.

## 629 **Intrinsic information**

630 Intrinsic information,  $I_{\text{int}} = I[x; y]$ , is the mutual information between the sequences  $x$   
631 and measurements  $y$  in a dataset. This quantity is somewhat tricky to estimate due to the high-  
632 dimensional nature of sequence space. We instead used three different methods to obtain the  
633 upper and lower bounds on  $I_{\text{int}}$  shown in **Fig. 3d** and **Fig. 5a**. More generally, we believe the  
634 development of both computational and experimental methods for estimating  $I_{\text{int}}$  is be an  
635 important avenue for future research.

636 To compute the upper bound on  $I_{\text{int}}$  for GB1 data (in **Fig. 3d**), we used the fact that

$$637 \quad I[x; y] = H[y] - \langle H_x[y] \rangle_x, \quad (31)$$

638 where  $H[y]$  is the entropy of all measurements  $y$ ,  $H_x[y]$  is the entropy of  $p(y|x)$  for a specific  
639 choice of sequence  $x$ , and  $\langle \cdot \rangle_x$  indicates averaging over all sequences  $x$ . In this dataset, the  
640 measurement values were computed using

$$641 \quad y = \log_2 \left[ \frac{c_s + 1}{c_i + 1} \right], \quad (32)$$

642 where  $c_i$  is the input read count and  $c_s$  is the selected read count.  $H[y]$  was estimated using the  
643 KNN estimator.<sup>47</sup> We estimated the uncertainty in  $y$  by propagating errors expected due to  
644 Poisson fluctuations in read counts, which gives

645 
$$\delta y = \log_2(e) \sqrt{\frac{1}{c_s+1} + \frac{1}{c_i+1}} . \quad (33)$$

646 Then, assuming  $p(y|x)$  to be approximately Gaussian, we find the corresponding conditional  
647 entropy to be

648 
$$H_x[y] = \frac{1}{2} \log_2(2\pi e \delta y^2) . \quad (34)$$

649 These  $H[y]$  and  $H_x[y]$  values were then used in **Eq. 31** to estimate  $I_{\text{int}}$ . This should provide an  
650 upper bound on the true value of  $I_{\text{int}}$  because uncertainty in  $y$  must be at least that expected  
651 under Poisson sampling of reads. We note, however, that the use of linear error propagation  
652 and the assumption that  $p(y|x)$  is approximately Gaussian complicate this conclusion. Also,  
653 when applied to MPSA data, this method yielded an upper bound of 0.96 bits. We believe this  
654 value is likely to be far higher than the true value of  $I_{\text{int}}$ , and that this mismatch probably  
655 resulted from read counts in the MPSA data being over-dispersed.

656 To compute the lower bound on  $I_{\text{int}}$  for GB1 data (**Fig. 3d**) we used the predictive  
657 information  $I_{\text{pre}}$  (on test data) of a GE regression model having a blackbox G-P map. This  
658 provides a lower bound because  $I_{\text{int}} \geq I_{\text{pre}}$  for any model (when evaluated on test data) due to  
659 the Data Processing Inequality and the Markov Chain nature of the dependencies  $y \leftarrow x \rightarrow \phi$  in  
660 **Fig. 2e**.<sup>20,29</sup>

661 To compute a lower bound on  $I_{\text{int}}$  for MPSA data (**Fig. 5c**), we leveraged the availability  
662 of replicate data in Wong et al..<sup>36</sup> Let  $y$  and  $y'$  represent the original and replicate  
663 measurements obtained for a sequence  $x$ . Because  $y \leftarrow x \rightarrow y'$  forms a Markov chain,  $I[x; y] \geq$   
664  $I[y; y']$ .<sup>29</sup> We therefore used an estimate of  $I[y; y']$ , computed using the KSG method,<sup>46,48</sup> as the  
665 lower bound for  $I_{\text{int}}$ .

666 **Uncertainties in kNN estimates**

667 MAVE-NN quantifies uncertainties in  $H[y]$  and  $I[y; \phi]$  using multiple random samples of  
668 half the data. Let  $\mathcal{D}_{100\%}$  denote a full dataset, and let  $\mathcal{D}_{50\%,r}$  denote a 50% subsample (indexed  
669 by  $r$ ) of this dataset. Given an estimator  $E(\cdot)$  of either entropy or mutual information, as well as  
670 the number of subsamples  $R$  to use, the uncertainty in  $E(\mathcal{D}_{100\%})$  is estimated as

$$671 \quad \delta E(\mathcal{D}_{100\%}) = \frac{1}{\sqrt{2}} \text{std} \left[ \left\{ E(\mathcal{D}_{50\%,r}) \right\}_{r=0}^{R-1} \right]. \quad (35)$$

672 MAVE-NN uses  $R = 25$  by default. We note that computing such uncertainty estimates  
673 substantially increases computation time, as  $E(\cdot)$  needs to be evaluated  $R + 1$  times instead of  
674 just once. We also note that bootstrap resampling<sup>51,52</sup> is often inadvisable in this context, as it  
675 systematically underestimates  $H[y]$  and overestimates  $I[y; z]$ .

## 676 Datasets

677 For the GB1 DMS dataset of Olson et al.,<sup>33</sup> measurements were computed using

$$678 \quad y_n = \log_2 \frac{(c_n^{\text{out}}+1)/(c_{\text{WT}}^{\text{out}}+1)}{(c_n^{\text{in}}+1)/(c_{\text{WT}}^{\text{in}}+1)},$$

679 where  $c_n^{\text{in}}$  and  $c_n^{\text{out}}$  respectively represent the number of reads from the input and output  
680 samples (i.e., pre-selection and post-selection libraries), and  $n = \text{WT}$  represents the 55 aa  
681 wildtype sequence, corresponding to positions 2-56 of the GB1 domain. To infer the model in  
682 **Fig. 3b** and to compute the information metrics in **Fig. 3c**, only double-mutant sequences with  
683  $c_n^{\text{in}} \geq 10$  were used; these represent 530,737 out of the 536,085 possible double mutants. For  
684 the models in **Figs. 3d-f**,  $y_n$  values for the 1045 single-mutant were also used in the inference  
685 procedure.

686 For the A $\beta$  DMS data of Seuma et al.<sup>34</sup> and TDP-43 DMS data of Bolognesi et al.,<sup>35</sup>  $y_n$   
687 values respectively represent nucleation scores and toxicity scores reported by the authors.

688 For the MPSA data of Wong et al.,<sup>36</sup> we used the data of library 1 replicate 1 obtained  
689 for the *BRCA2* minigene data. Measurements were computed as

690 
$$y_n = \log_{10} \left[ 100 \times \frac{(c_n^{\text{inc}}+1)/(c_{\text{CONS}}^{\text{inc}}+1)}{(c_n^{\text{tot}}+1)/(c_{\text{CONS}}^{\text{tot}}+1)} \right],$$

691 where  $c_n^{\text{inc}}$  and  $c_n^{\text{tot}}$  respectively represent the number of barcode reads obtained from exon  
692 inclusion isoforms and from total mRNA, and  $n = \text{CONS}$  corresponds to the consensus 5' ss  
693 sequence CAG/GUAAGU. Corresponding PSI values were computed as  $\text{PSI}_n = 10^{y_n}$ . Only  
694 sequences with  $c_n^{\text{tot}} \geq 10$  were used, representing 30,483 of the 32,768 possible sequences of  
695 the form NNN/GYNNNN.

696 For the *lac* promoter sort-seq MPRA data of Kinney et al.,<sup>16</sup> we used data from the “full-  
697 wt” experiment (available at [https://github.com/jbkinney/09\\_sortseq](https://github.com/jbkinney/09_sortseq)). For the *xyIE* promoter  
698 sort-seq MPRA data of Bellilveau et al.,<sup>43</sup> we used data kindly provided by the authors.

699

700 **References**

- 701 1. Kinney, J. B. & McCandlish, D. M. Massively parallel assays and quantitative sequence-  
702 function relationships. *Annu Rev Genom Hum G* **20**, 99-127 (2019).
- 703 2. Starita, L. M. *et al.* Variant interpretation: functional assays to the rescue. *Am J Hum Genetics*  
704 **101**, 315-325 (2017).
- 705 3. Fowler, D. M. & Fields, S. Deep mutational scanning: a new style of protein science. *Nat*  
706 *Methods* **11**, 801-807 (2014).
- 707 4. Levo, M. & Segal, E. In pursuit of design principles of regulatory sequences. *Nat Rev Genet*  
708 **15**, 453-468 (2014).
- 709 5. White, M. A. Understanding how cis-regulatory function is encoded in DNA sequence using  
710 massively parallel reporter assays and designed sequences. *Genomics* **106**, 165-170 (2015).
- 711 6. Inoue, F. & Ahituv, N. Decoding enhancers using massively parallel reporter assays.  
712 *Genomics* **106**, 159-164 (2015).
- 713 7. Peterman, N. & Levine, E. Sort-seq under the hood: implications of design choices on large-  
714 scale characterization of sequence-function relations. *BMC Genomics* **17**, 206 (2016).
- 715 8. Fowler, D. M., Araya, C. L., Gerard, W. & Fields, S. Enrich: software for analysis of protein  
716 function by enrichment and depletion of variants. *Bioinformatics* **27**, 3430-3431 (2011).
- 717 9. Alam, K. K., Chang, J. L. & Burke, D. H. FASTAptamer: A bioinformatic toolkit for high-  
718 throughput sequence analysis of combinatorial selections. *Mol Ther-Nucleic Acids* **4**, e230  
719 (2015).
- 720 10. Bloom, J. D. Software for the analysis and visualization of deep mutational scanning data.  
721 *BMC Bioinformatics* **16**, 168 (2015).
- 722 11. Rubin, A. F. *et al.* A statistical framework for analyzing deep mutational scanning data.  
723 *Genome Biol* **18**, 1-15 (2017).
- 724 12. Ashuach, T. *et al.* MPRAnalyze: statistical framework for massively parallel reporter assays.  
725 *Genome Biol* **20**, 183 (2019).
- 726 13. Niroula, A., Ajore, R. & Nilsson, B. MPRAScore: robust and non-parametric analysis of  
727 massively parallel reporter assays. *Bioinformatics* **35**, 5351-5353 (2019).
- 728 14. Faure, A. J., Schmiedel, J. M., Baeza-Centurion, P. & Lehner, B. DiMSum: an error model  
729 and pipeline for analyzing deep mutational scanning data and diagnosing common experimental  
730 pathologies. *Genome Biol* **21**, 207 (2020).
- 731 15. Atwal, G. S. & Kinney, J. B. Learning quantitative sequence-function relationships from  
732 massively parallel experiments. *J Stat Phys* **162**, 1203-1243 (2016).



- 733 16. Kinney, J. B., Murugan, A., Callan, C. G. & Cox, E. C. Using deep sequencing to  
734 characterize the biophysical mechanism of a transcriptional regulatory sequence. *Proc Natl*  
735 *Acad Sci USA* **107**, 9158-9163 (2010).
- 736 17. Melnikov, A. *et al.* Systematic dissection and optimization of inducible enhancers in human  
737 cells using a massively parallel reporter assay. *Nat Biotechnol* **30**, 271-277 (2012).
- 738 18. Mogno, I., Kwasnieski, J. C. & Cohen, B. A. Massively parallel synthetic promoter assays  
739 reveal the in vivo effects of binding site variants. *Genome Res* **23**, 1908-1915 (2013).
- 740 19. Abadi, M. *et al.* TensorFlow: A Systems for Large-Scale Machine Learning. in *Proceedings*  
741 *of the 12th USENIX Symposium on Operating Systems Design and Implementation (OSDI '16)*  
742 (2016).
- 743 20. Kinney, J. B. & Atwal, G. S. Parametric inference in the large data limit using maximally  
744 informative models. *Neural Comput* **26**, 637-653 (2014).
- 745 21. Pokusaeva, V. O. *et al.* An experimental assay of the interactions of amino acids from  
746 orthologous sequences shaping a complex fitness landscape. *PLoS Genet* **15**, e1008079  
747 (2019).
- 748 22. Kinney, J. B., Tkačik, G. & Callan, C. G. Precise physical models of protein-DNA interaction  
749 from high-throughput data. *Proc Natl Acad Sci USA* **104**, 501-506 (2007).
- 750 23. Otwinowski, J. & Nemenman, I. Genotype to phenotype mapping and the fitness landscape  
751 of the *E. coli lac* promoter. *PLoS ONE* **8**, e61570 (2013).
- 752 24. Sarkisyan, K. S. *et al.* Local fitness landscape of the green fluorescent protein. *Nature* **533**,  
753 397-401 (2016).
- 754 25. Sailer, Z. R. & Harms, M. J. Detecting high-order epistasis in nonlinear genotype-phenotype  
755 maps. *Genetics* **205**, 1079-1088 (2017).
- 756 26. Otwinowski, J., McCandlish, D. M. & Plotkin, J. B. Inferring the shape of global epistasis.  
757 *Proc Natl Acad Sci USA* **115**, E7550-E7558 (2018).
- 758 27. Jones, M. C. & Faddy, M. J. A skew extension of the t-distribution, with applications. *J Roy*  
759 *Stat Soc B* **65**, 159-174 (2003).
- 760 28. Kinney, J. B. & Atwal, G. S. Equitability, mutual information, and the maximal information  
761 coefficient. *Proc Natl Acad Sci USA* **111**, 3354-3359 (2014).
- 762 29. Cover, T. M. & Thomas, J. A. *Elements of information theory*. (Wiley, 2006).
- 763 30. Barber, D. & Agakov, F. The IM algorithm: a variational approach to information  
764 maximization. *Advances in neural information processing systems* **16**. (2004).
- 765 31. Alemi, A. A., Fischer, I., Dillon, J. V. & Murphy, K. Deep variational information bottleneck.  
766 *arXiv:1612.00410* (2016).

- 767 32. Chalk, M., Marre, O. & Tkacik, G. Relevant sparse codes with variational information  
768 bottleneck. *arXiv:1605.07332* (2016).
- 769 33. Olson, C. A., Wu, N. C. & Sun, R. A comprehensive biophysical description of pairwise  
770 epistasis throughout an entire protein domain. *Curr Biol* **24**, 2643-2651 (2014).
- 771 34. Seuma, M., Faure, A., Badia, M., Lehner, B. & Bolognesi, B. The genetic landscape for  
772 amyloid beta fibril nucleation accurately discriminates familial Alzheimer's disease mutations.  
773 *eLife* **10**, e63364 (2021).
- 774 35. Bolognesi, B. *et al.* The mutational landscape of a prion-like domain. *Nat Commun* **10**, 4162  
775 (2019).
- 776 36. Wong, M. S., Kinney, J. B. & Krainer, A. R. Quantitative activity profile and context  
777 dependence of all human 5' splice sites. *Mol Cell* **71**, 1012-1026.e3 (2018).
- 778 37. Bintu, L. *et al.* Transcriptional regulation by the numbers: models. *Curr Opin Genet Dev* **15**,  
779 116-124 (2005).
- 780 38. Sherman, M. S. & Cohen, B. A. Thermodynamic state ensemble models of cis-regulation.  
781 *Plos Comput Biol* **8**, e1002407 (2012).
- 782 39. Wong, F. & Gunawardena, J. Gene Regulation in and out of equilibrium. *Annu Rev Biophys*  
783 **49**, 199-226 (2020).
- 784 40. Otwinowski, J. Biophysical inference of epistasis and the effects of mutations on protein  
785 stability and function. *Mol Biol Evol* **35**, 2345-2354 (2018).
- 786 41. Manhart, M. & Morozov, A. V. Protein folding and binding can emerge as evolutionary  
787 spandrels through structural coupling. *Proc Natl Acad Sci USA* **112**, 1797-1802 (2015).
- 788 42. Nisthal, A., Wang, C. Y., Ary, M. L. & Mayo, S. L. Protein stability engineering insights  
789 revealed by domain-wide comprehensive mutagenesis. *Proc Natl Acad Sci USA* **116**, 16367-  
790 16377 (2019).
- 791 43. Belliveau, N. M. *et al.* Systematic approach for dissecting the molecular mechanisms of  
792 transcriptional regulation in bacteria. *Proc Natl Acad Sci USA* **115**, 201722055 (2018).
- 793 44. Browning, D. F. & Busby, S. J. W. Local and global regulation of transcription initiation in  
794 bacteria. *Nat Rev Microbiol* **14**, 638-650 (2016).
- 795 45. Tareen, A. & Kinney, J. B. Logomaker: beautiful sequence logos in Python. *Bioinformatics*  
796 **36**, 2272-2274 (2020).
- 797 46. Steeg, G. V. Non-Parametric Entropy Estimation Toolbox (NPEET).  
798 <https://www.isi.edu/~gregv/npeet.html> (2014).
- 799 47. Vasicek, O. A test for normality based on sample entropy. *J Roy Stat Soc B* **38**, 54-59  
800 (1976).

- 801 48. Kraskov, A., Stögbauer, H. & Grassberger, P. Estimating mutual information. *Phys Rev E*  
802 **69**, 066138 (2004).
- 803 49. Gao, S., Steeg, G. V. & Galstyan, A. Efficient estimation of mutual information for strongly  
804 dependent variables. In *Artificial intelligence and statistics (pp. 277-286)*. PMLR.
- 805 50. Sharpee, T., Rust, N. C. & Bialek, W. Analyzing neural responses to natural signals:  
806 maximally informative dimensions. *Neural Comput* **16**, 223-250 (2004).
- 807 51. Efron, B. Bootstrap methods: another look at the jackknife. *Ann Stat* **7**, 1-26 (1979).
- 808 52. Efron, B. & Tibshirani, R. Bootstrap methods for standard errors, confidence intervals, and  
809 other measures of statistical accuracy. *Stat Sci* **1**, 54-75 (1986).
